# Supplementary material for: Functional Characterization of TkSRPP Promoter in Response to Hormones and Wounding Stress in Transgenic Tobacco
Source: MDPI journal article supplement (doi:10.3390/plants12020252), 2023-01-05
Supplement: s1 [file s1]

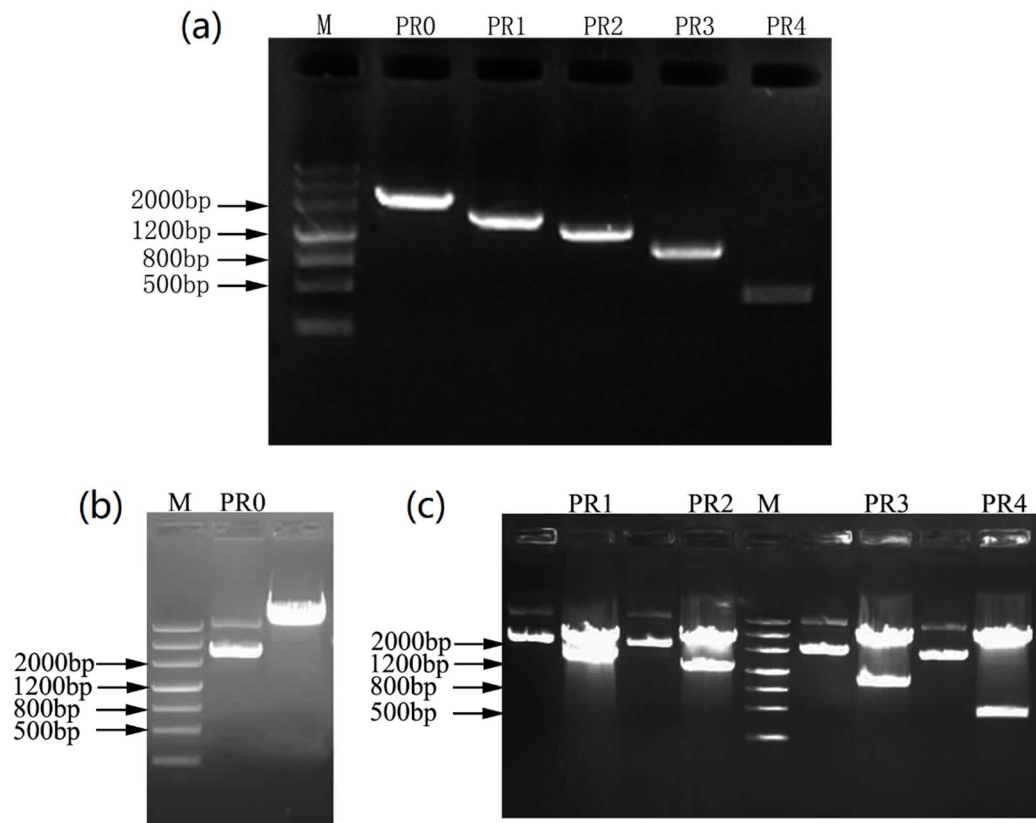

Figure S1

Cloning and double digests analysis of different *TkSRPP* promoters. (a): Cloning of the full-length *TkSRPP* promoter (PR0). (b): Double digests of the pCAMBIA1304-PR0::GUS recombinant plasmid. (c): Double digests of the pCAMBIA1304-PR1/PR2/PR3/PR4::GUS recombinant plasmid.

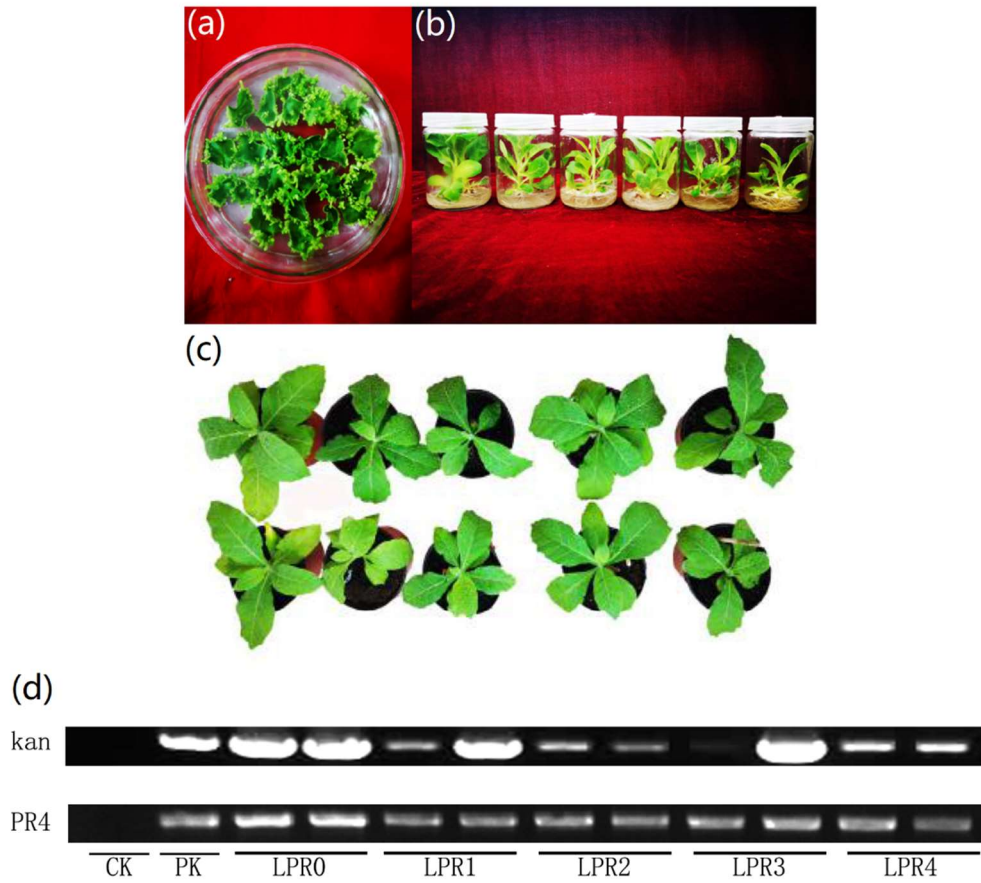

Figure S2

Genetic transformation and identification of transgenic tobacco with different deletion promoters

(a): The callus of tobacco leaves differentiated into regenerative buds. (b): Rooting stage of tobacco regeneration buds. (c): The soil culture stage of transgenic tobacco. (d): Transgenic tobacco was identified using *Kan* gene primers and PR4 promoter primers, respectively.
