# Supplementary material for: Functional Characterization of TkSRPP Promoter in Response to Hormones and Wounding Stress in Transgenic Tobacco
Source: MDPI journal article supplement (doi:10.3390/plants12020252), 2023-01-05
Supplement: s1 [file s1]

Table S1 Primer sequences of different *TkSRPP* promoter cloning

| Primer name | Primer sequence (5'-3')                 |
|-------------|-----------------------------------------|
| SRPP-FP     | TGCCCCACTACTTTGGAGGGATT                 |
| SRPP-RP     | AACAGAAGCAGCGTCGGTCA                    |
| SRPP-FP0    | <u>GGGATCCC</u> TGCCCCACTACTTTGGAGGGATT |
| SRPP-FP1    | <u>GGGATCCC</u> AACTCCACTTGAAAGCGAGCC   |
| SRPP-FP2    | <u>GGGATCCC</u> AGCCCCTCCATCAATATGAACTT |
| SRPP-FP3    | <u>GGGATCCC</u> GGACCCAAATCATCACCACAAG  |
| SRPP-FP4    | <u>GGGATCCC</u> ACATAGATCCCTGGAGGCGG    |
| SRPP-RP0    | <u>CCCATGGG</u> AACAGAAGCAGCGTCGGTCA    |

The underlined part form restriction sites: *Bam*H I (GGGATCCC) and *Noc* I (CCCATGGG)

Table S2 Identification of different SRPP promoter transgenic tobacco

| Primer name | Primer sequence (5'-3') |
|-------------|-------------------------|
| NPT II-FP1  | CACTGAAGCGGGAAGGGACT    |
| NPT II-RP1  | CGATACCGTAAAGCACGAGGAA  |
| SRPP-FP4    | ACATAGATCCCTGGAGGCGG    |
| SRPP-RP0    | AACAGAAGCAGCGTCGGTCA    |

Table S3 Quantitative Primer sequences of *TkSRPP* gene

| Primer name | Primer sequence (5'-3') |
|-------------|-------------------------|
| SRPP-FP5    | CCAGAAGCCTGTCAACTAACG   |
| SRPP-RP5    | TGGAACCAATGGCAGATAAGA   |
| GAPDH-FP1   | CGCCTCATTTAACATCATCC    |
| GAPDH-RP1   | GTCATACCACGAAACCAGCT    |

Table S4 Quantitative Primer sequences of *GUS* gene

| Primer name | Primer sequence (5'-3')  |
|-------------|--------------------------|
| GUS-FP1     | CCAGAAGCCTGTCAACTAACG    |
| GUS-RP1     | TGGAACCAATGGCAGATAAGA    |
| NbEF1-FP1   | GATTGGTGGTAT TGGAAGTGTCC |
| NbEF1-RP1   | GAGCTTCGTGGTGCATCTC      |
