# Supplementary material for: Functional Characterization of TkSRPP Promoter in Response to Hormones and Wounding Stress in Transgenic Tobacco
Source: MDPI journal article supplement (doi:10.3390/plants12020252), 2023-01-05
Supplement: s1 [file s1]

>utg19387|GWHAAAA00015227. 86556  
Length=86556

Score = 3635 bits (4030), Expect = 0.0  
Identities = 2138/2213 (97%), Gaps = 25/2213 (1%)  
Strand=Plus/Minus

```
Query 1   TGCCCACTACTTTGGAGGGAtttttttCAACTGCTCACTTGCAGCCTTATCATAAAAGCT 60
      |
Sbjct 66869 TGCCCACTACTTTGGAGGGATTTTTTTCAACTACTCACTTGCAGCCTTATCATAAAAGCT 66810

Query 61   AAATTCAGACATGAAATGCTCAAACCTCGGGTATTGTGGTGGCAGTGGCACATTTCCATAA 120
      |
Sbjct 66809 AAATTCAGACATGAAATGCTCAAACCTCGGGTATTGTGGTGGCAGTGGCACATTTCCATAA 66750

Query 121  ATAATCCTTGTACACTGTCGGCTTCCAAACCTTCTATCTAATGAGTAATTATAATATTAT 180
      |
Sbjct 66749 ATAATCATTGTACACTGTCGGCTTCCAAACCTTCT---TCATG-----TTTTGATAT--- 66701

Query 181  ACCTTATTGCTACATATTGCTGGAATAAGTACCTGGAACATTGGGGAAGCGGCTACATAT 240
      |
Sbjct 66700 ATGTGTCTGAGACAAAA--CTTGT----GTTC--GG--CATGGGGGAAGCGGCTACATAT 66651

Query 241  TGCTGGAATAAGTACCTGGAACATTGGAGCATAAAAAAGCACAAAACATTATAAAACTGAG 300
      |
Sbjct 66650 TGCTGGAATAAGTCCCTGTAACATTGGAGCATAAAAAAGCACAAAACATTATAAAACTGAG 66591

Query 301  TAGAAATATTGAAATATAAAACTACAAGACATCATATAACACAGTAGAGAAAGTTTTACC 360
      |
Sbjct 66590 TAGAAATATTGAAATATAAAACTACAAGACATCATATAACACAATAGAGAAAGTTTTACC 66531

Query 361  TTTTGCCTATCGGTGATGAATGTGAAGTTTAAGTTTCCACTAATGCTCTAAGGGGAACCC 420
      |
Sbjct 66530 TTTTGCCTATCGGTGATGAATGTGAAGTTTGAGTTTCCACTAATGCGCTAAGGGGAACCC 66471

Query 421  GAGGGTCTGATTCTATTTGGCTTAGGATTTCTTTAGAGAGGAAAGTAGCTGTACAAGCTC 480
      |
Sbjct 66470 GAGGGGCTGTTTCTATTTGGCTTAGGATTTCTTTAGAGAGGAAAGTACCTGTACAAGCTC 66411

Query 481  TAAGCTTTCTACTTCTCAAGCACGAGTGGTTGTCATGACAAACCAATCAGATTCTTCATT 540
      |
Sbjct 66410 TAAGCTTTCTACTTCTCAAGCACGAGTGGTTGTCATGACAAACCAATCAGATTCTTCATT 66351

Query 541  TGACCTTGAAGCATGTAGGGCCCACTTGCAACCTTCCTTTTTGGAGTTCACACATTTGTC 600
      |
Sbjct 66350 TGACCTTGAAGCATGTAGGGCCCACTTGCAACCTTCCTTTTTGGAGTTCACACATTTGTC 66291

Query 601  CTTGCTTTTAGTTGTCCCAACAACCTCACTTGAAAGCGAGCCAACCACTACACCTCTACA 660
      |
Sbjct 66290 CTTGCTTTTAGTTGTCCCAACAACCTCACTTGAAAGCGAGCCAACCACTACACCTCTACA 66231

Query 661  TTTTGCCCGAAGTCTCAATTTGTCAttttttCAAATACAAATTTCTCCTAGTTTGTAT 720
      |
Sbjct 66230 TTTTGCCCGAAGTCTCAATTTGTCATTTTTTTTCAAATACAAATTTCTCCTAGTTTGTAT 66171

Query 721  TGCATGAGCATCTATGAGATCTTTTAATTCTTTCTTTGACTTGAACCTTTTGCTCGACATA 780
      |
Sbjct 66170 TGCATGAGCATCTATGAGATCTTTTAATTCTTTCTTTGACTTGAACCTTTTGCCCGACATA 66111

Query 781  AAAGCTTGCTTTGTGAACATTTCCAAGATTGCATTTCTTCTCCTTACCCAAATTCTTGAG 840
```

|  
Sbjct 66110 AAAGCTTGCTTTGTGAACATTTCCAAGATTGCATTTCTTCTCCTTACCCAAATTCTTGAG 66051  
Query 841 AACATTTCTTCTTCTCATGTCATCATCAGACCCTTCATCTAAAGAATCCCATCTTTCATT 900  
Sbjct 66050 AACATTTCTTCTTCTCATGTCATCATCAGACCCTTCATCTAAAGAATCTCATCTTTCATT 65991  
Query 901 ATCTATTACATCCAAATCCTCATCAACTTCTTCATCAGTAGCCCCTCCATCAATATGAAC 960  
Sbjct 65990 ATCTATTACATCCAAATCCTCATCAACTTCTTCATCAGTAGCCCCTCCATCAATATGAAC 65931  
Query 961 TTCACTTTCATCTCTATCAAGGTTTAGTGTGAAATCAGCCATATCAACCTCAACTTCTGG 1020  
Sbjct 65930 TTCACTTTCATCTCTATCAAGGTTTAGTGTGAAATCAGCCATATCAACCTCAACTTCTGG 65871  
Query 1021 TACATTATTCTCCTCGTCTACAAGGTCGTCTTCCTTTAAATCAGCACCTTCATCACCTTC 1080  
Sbjct 65870 TACATTATTCTCCTCGTCTACAAGGTCGTCTTCCTCTAAATCAGCACCTTCATCACCTTC 65811  
Query 1081 TTTTTCAGTTGGCTGGTCTTCATCACTCTCATCTTCAAGTGGCTGGTCTTCATCACTCTC 1140  
Sbjct 65810 TTTTTCAGTTGGCTGGTCTTCATCACTCTCATCTTCAAGTAGCTGGTCTTCATCACTCTC 65751  
Query 1141 AAAGAGCATCATTGACATATATTCTCCTATAGCTGATGGCATTTCATCTAGAAGAAAAAA 1200  
Sbjct 65750 AAAGAGCATCATTGACATATATTCTCCTATAGCTGATGGCATTTCATCTAGAAGAAAAAA 65691  
Query 1201 CATAGCATTAATATCATCAAATAAACCTG---aaaaaaatgtgtaaaaaaCCGTGTGCCC 1257  
Sbjct 65690 CATAGCATTAATATCATCAAAGAAACCTGGAAAAAAAAGTGTGTAAAAAACCGTGTGCCC 65631  
Query 1258 AATATTATCTAAATATGTGGGACCCAAATCATCACCACAAGTATACCAAGTTTATGTTTT 1317  
Sbjct 65630 AACATTATCTAAATATGTGGGACCCAAATCATCACCACAAGTATACCAAGTTTATGTTTT 65571  
Query 1318 TTAAATTTTGTTAATTGAAGTTAGTTAAACATCTATTATTGTTTTGAGTTTAATATAGAG 1377  
Sbjct 65570 TTAAATTTTGTTAATTGAAGTTAGTTAAACATCTATTATTGTTTTGAGTTTAATATAGAG 65511  
Query 1378 TAAATGCTGCCTTCTTCTATAAAAATTCGTAAAGAAATTCATACACCAACGATTTTACT 1437  
Sbjct 65510 TAAATGCTGCCTTCTTCTAGAAAAATTCGTAAAGAAATTCATACACCAACGATTTTACT 65451  
Query 1438 TAAGTGTCGTTCTCTATGAATTGGAAGTGGTAACAAATTGTTTTAAAGCTTTTTTCACGAC 1497  
Sbjct 65450 TAAGTGTCGTTCTCTATGAATTGGAAGTGGTAACAAATTGTTTTAAAGCTTTTTTCACGAC 65391  
Query 1498 TAATTTTAGTGTGTAAAGATGTTGCTTTTTGCTTTTTACTGTTGTCATTAAACGATTAGAT 1557  
Sbjct 65390 TCATTTTAGTGTGTAAAGATGTTGCTTTTTGCTTTTTACTGTTGTCATTAAACGATTAGAT 65331  
Query 1558 GTAAGAATTCATAAATAAGGTTTGAGATGCATATCGTGAAACCAGTTGATAGAAACAGAT 1617  
Sbjct 65330 GTAAGAATTCATAAATAAGGTTTGAGATGCATATCGTGAAACCAGTTGATAGAAACAGAT 65271  
Query 1618 ACGCAATGATAGAGAGACGCAACCAAGGAATACAGATACAAGCGATACACAGATGACGAT 1677  
Sbjct 65270 ACGCAATGATAGAGAGACGCAACCAAGTAATACAGATACAAGCGATACAAGGATGACGAT 65211  
Query 1678 ACAAGGATAGAGAACTAACCATTAGCGCCGGACATGTCGCCTGTTTGCCCGCCAGAGAAG 1737  
|

Sbjct 65210 ACAAGGATAGAGAACTAACCATTTCGCGCCGGACATGTGCGCTGTTTGCCCGCCAGAGAAG 65151

Query 1738 TAACGGGAGGGTTTCTGTGTTAAACATAGATCCCTGGAGGCGGGAAGACAAATTTGCCCT 1797

Sbjct 65150 TAACGGGAGGGTTTCTGTGTTAAACATAGATCCCTGGAGGCGGAAAGACAAATTTGCCCT 65091

Query 1798 CGTGTGCAGTGCACATGAGGGTTTAAACGGGTTTAGGTAAACGGGAGTTAAAGGTAGGGAC 1857

Sbjct 65090 CGTGTGCAGTGCACATGAGGGTTTAAACGGGTTTAGGTAAACGGGAGTTAAAGGCAGGGAC 65031

Query 1858 AGAAACCACAATGAAACATTGAAAGAATGACTGTTTATCCAAGTTTTAAAGTTAAGGGAC 1917

Sbjct 65030 AGAAACCACAATGAAACATTTAAATAATGACTGTTTATCCAAGTTTTAAAGTTAAGGGAC 64971

Query 1918 TCAAACCATAG-TTTTTCCAAACCACATGGACTtttttttGCAGTTTTGTCAATATTTA 1976

Sbjct 64970 TCAAACCACAGTTTTTTCCAAACCACAGGGACCTTTTTTTTGGAGTTTTGTCAATATTTT 64911

Query 1977 ATCAATCTATATTTTCATTATAATTATCGACACTCCTGGACCCACAGTAGTACAGTTAAA 2036

Sbjct 64910 ATCAATCTATATTTTCATTATAATTATCGACACTCCTGGACCCACAGTAGTACGGTTAAA 64851

Query 2037 CATTTAGTTTTCGTGGAATTTATGCCCCTAAAACCCACTCTATATAAATAACGATGCATG 2096

Sbjct 64850 CATTTAGTTTTCGTGGAATTTATGCCCCTAAAACCCACTCTATATAAATAACGATGCATG 64791

Query 2097 GACAGAGATATGAATACACTTTCTGATTTAAGCAACAATCATTTCTCGATAGACGACTTT 2156

Sbjct 64790 GACAGAGATATGAATACACTTTCTGATTTAAGCAACAATCATTTCTCGATAGACGACTTT 64731

Query 2157 TCATCTCGTTTTGAACCATATACATCTTGATCATGACCGACGCTGCTTCTGTT 2209

Sbjct 64730 TCATCTCGTTTTGAACCATATACATCTTGATCATGACCGACGCTGCTTCTGTT 64678
